# Supplementary material for: [Retracted] Identification of Peptides as Novel Inhibitors to Target IFN‐γ, IL‐3, and TNF‐α in Systemic Lupus Erythematosus
Source: Hindawi journal article supplement (doi:10.1155/2021/1124055), 2021-01-01
Supplement: f1 [file 1124055.f1.docx]

**Identification of peptides as novel inhibitors to target IFN-γ, IL-3 and TNF-α for systemic lupus erythematosus**

**Supplementary file**

| 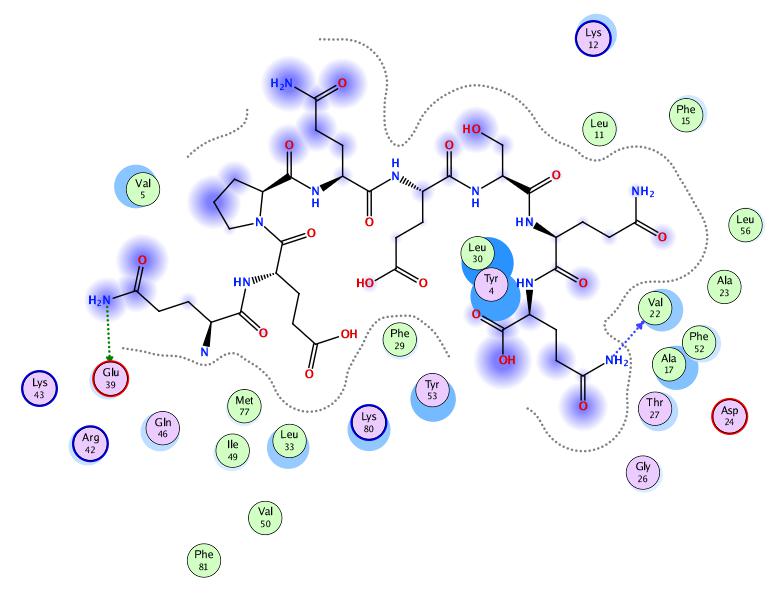  **(a)** | 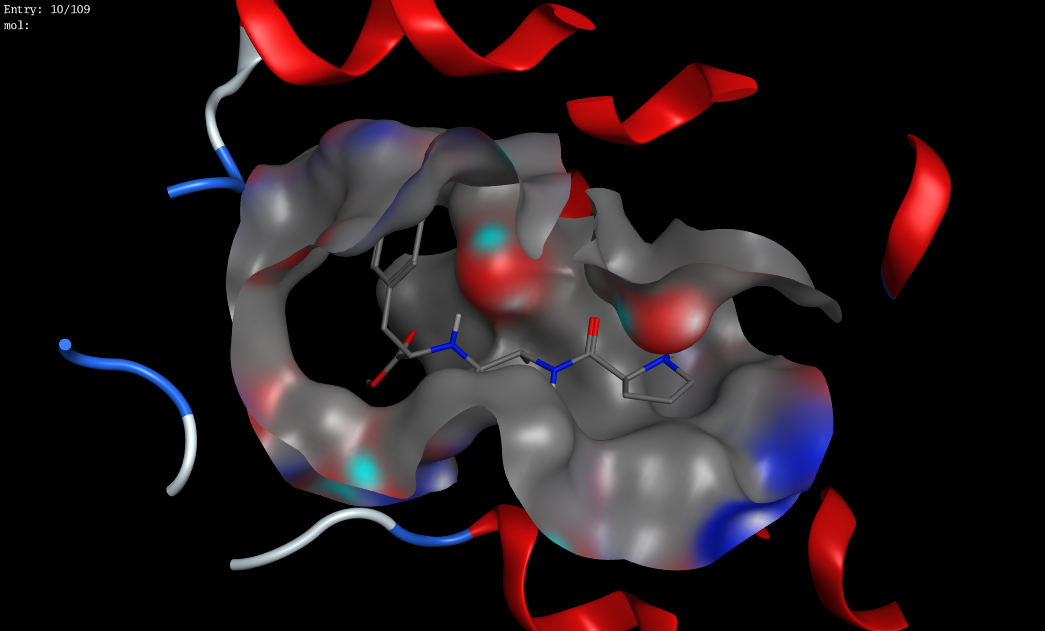  **(b)** |
| --- | --- |

**Figure S1: Interactions (a) and binding pattern (b) of QEPQESQQ peptide with IFN-γ.**

| 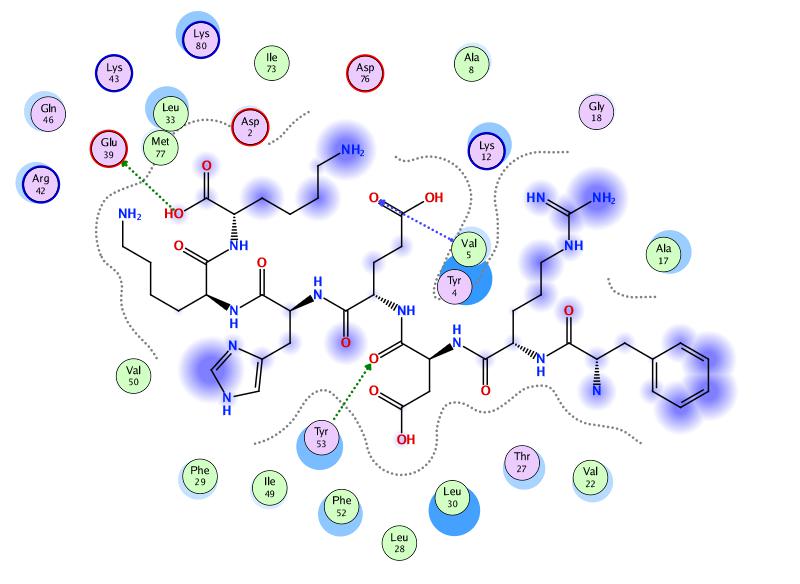  **(a)** | 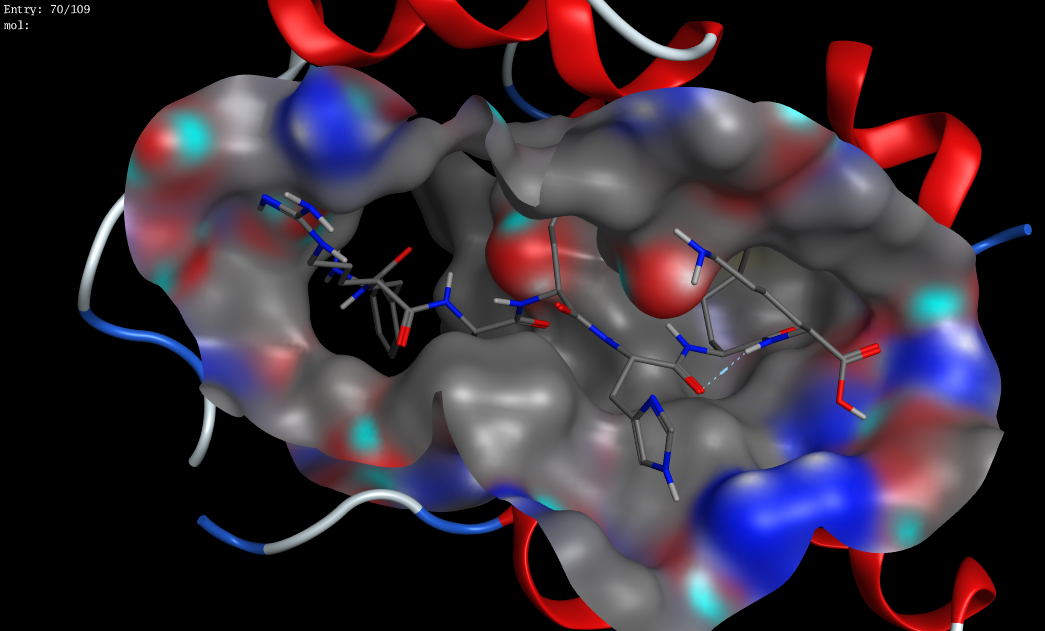  **(b)** |
| --- | --- |

**Figure S2: Interactions (a) and binding pattern (b) of FRDEHKK peptide with IFN-γ.**

| 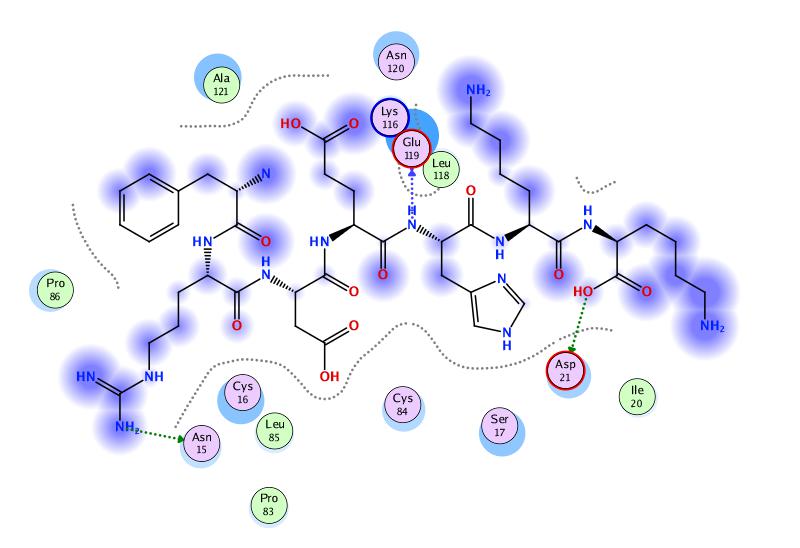  **(a)** | 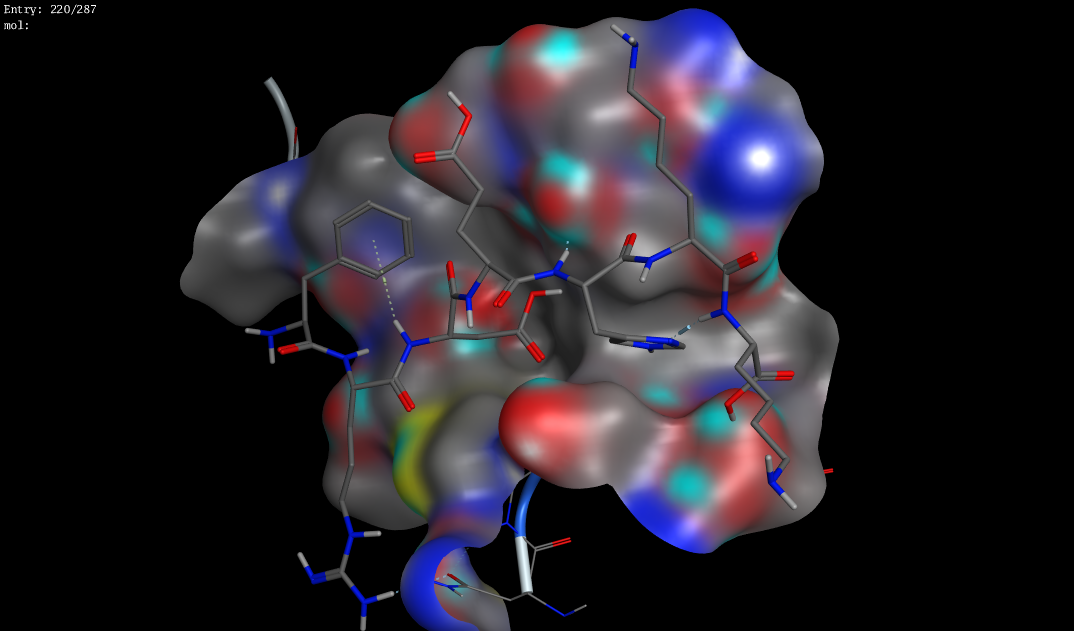  **(b)** |
| --- | --- |

**Figure S3: Interactions (a) and binding pattern (b) of FRDEHKK peptide with IL-3.**

| 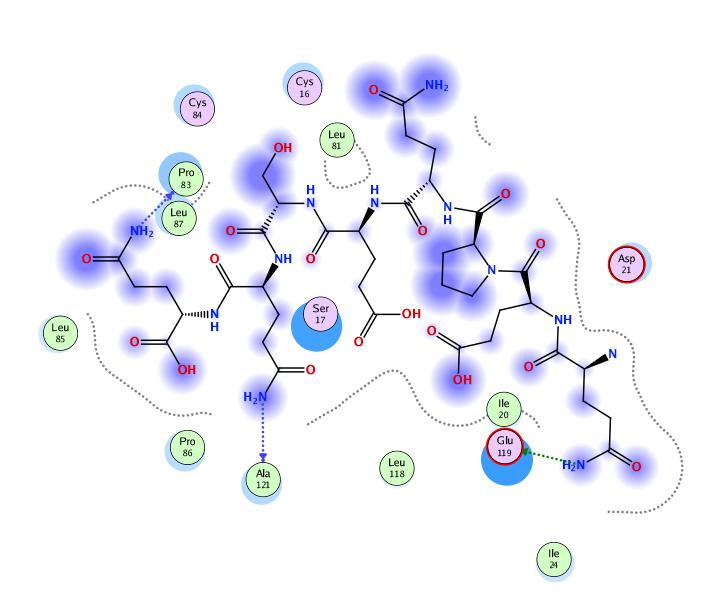  **(a)** | 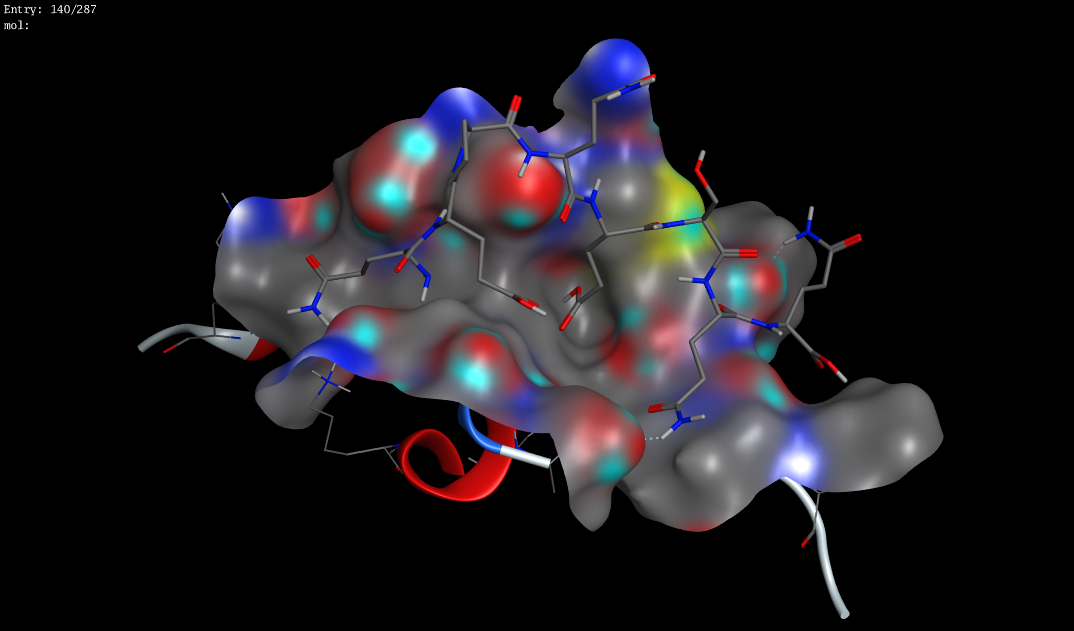  **(b)** |
| --- | --- |

**Figure S4: Interactions (a) and binding pattern (b) of QEPQESQQ peptide with IL-3.**

| 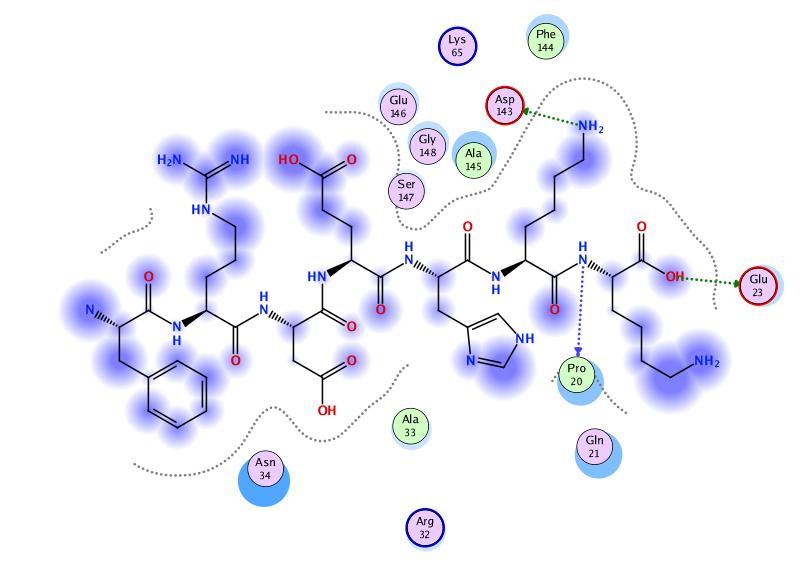  **(a)** | 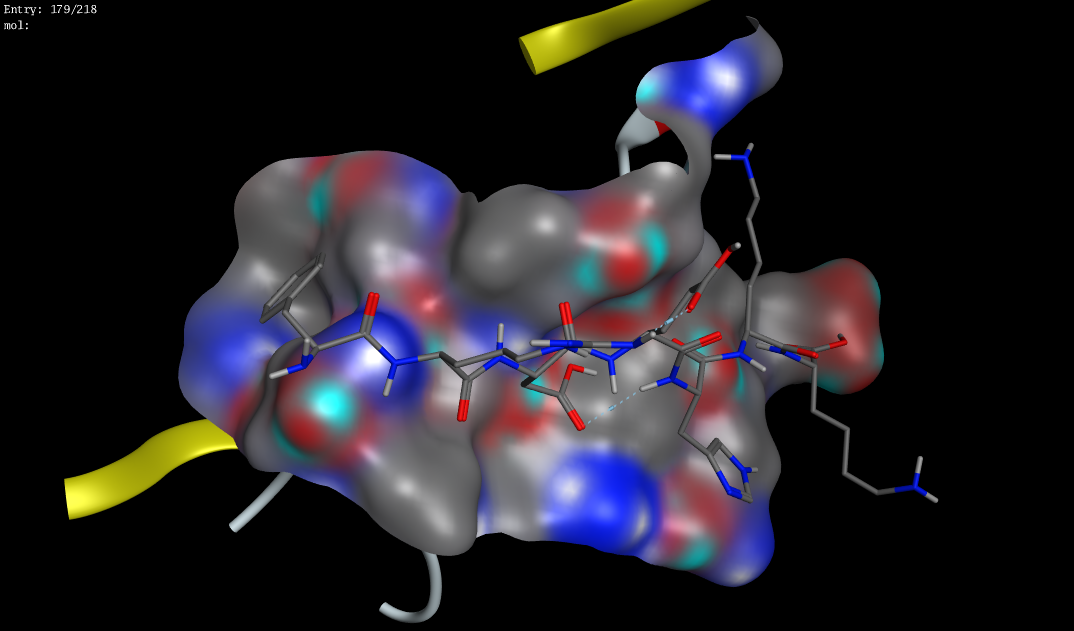  **(b)** |
| --- | --- |

**Figure S5: Interactions (a) and binding pattern (b) of FRDEHKK peptide with TNF-α.**

| 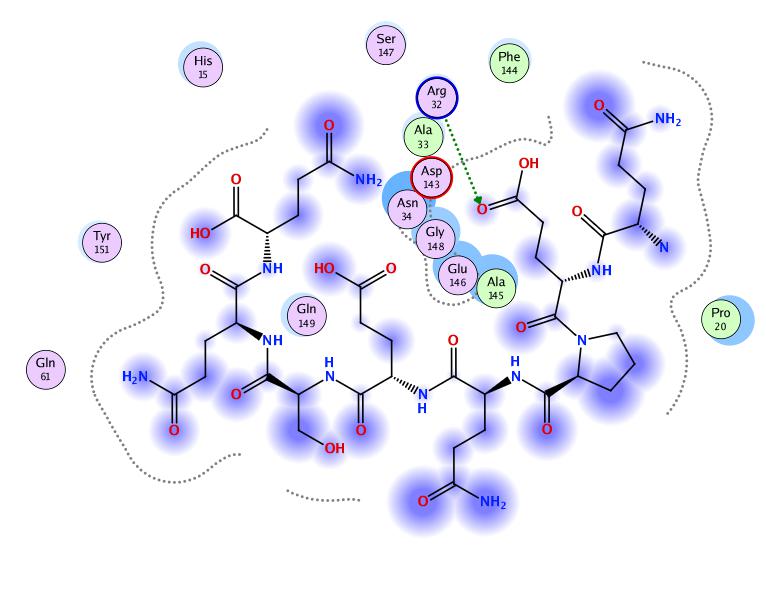  **(a)** | 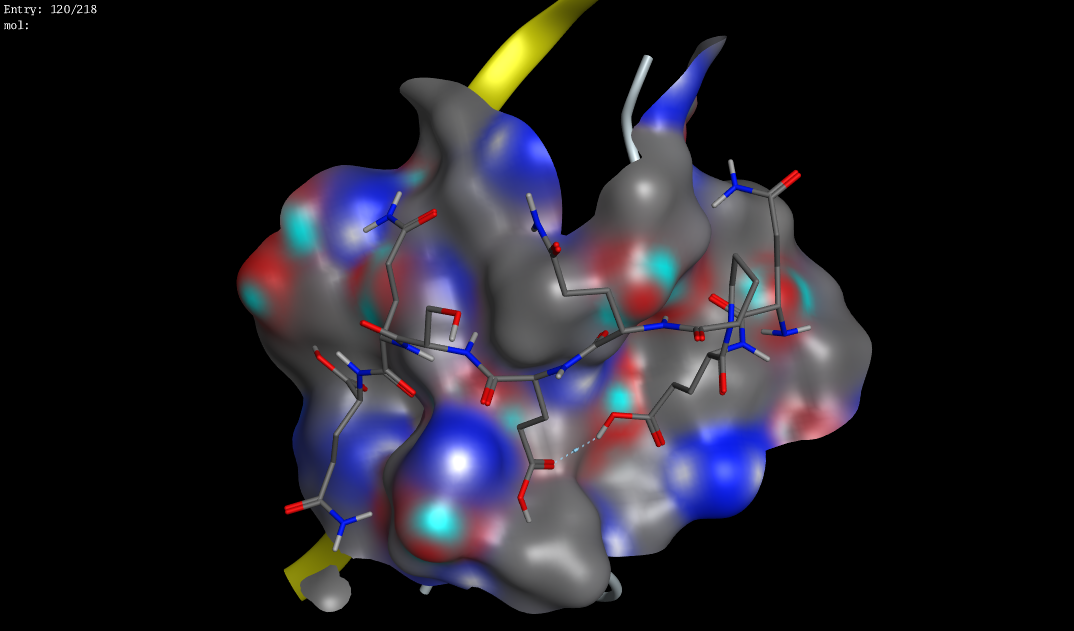  **(b)** |
| --- | --- |

**Figure S6: Interactions (a) and binding pattern (b) of QEPQESQQ peptide with TNF-α.**


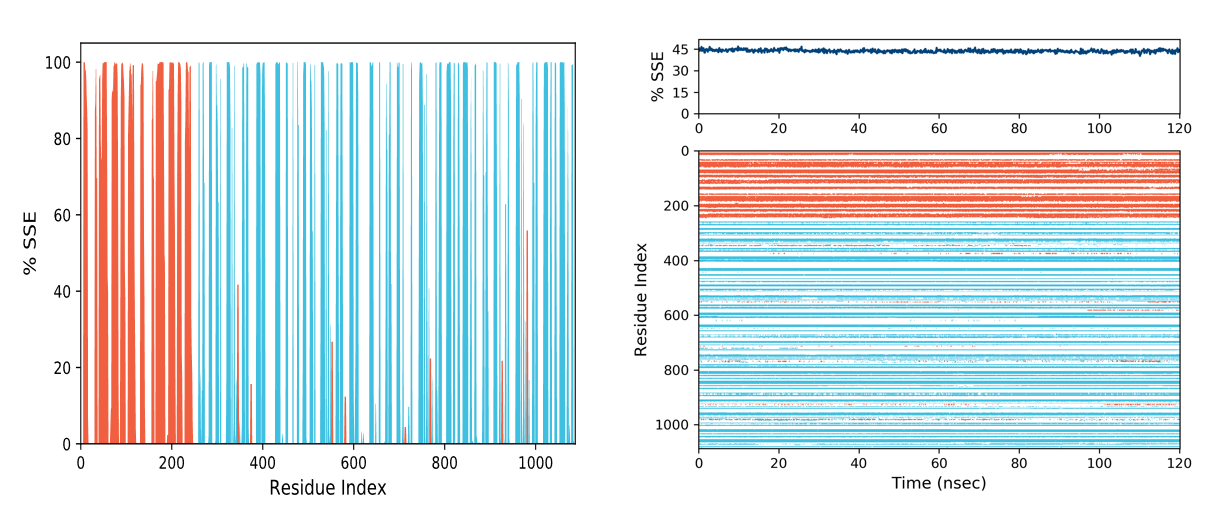


**Figure S7: Protein secondary structure element distribution by residue index throughout the protein structure.** Red indicates α-helices, and blue indicates β-strands.
